1

2 **Mutation-driven evolution of *Pseudomonas aeruginosa* in the presence of either**  
 3 **ceftazidime or ceftazidime/avibactam**

4 Fernando Sanz-García, Sara Hernando-Amado, José Luis Martínez\*

5 Centro Nacional de Biotecnología, CSIC, 28049 Madrid, Spain.

6 \*Corresponding author. jlmtnz@cnb.csic.es

7 Phone 34 5854542

8 Fax: 3458584506

9

10 ***Running title:*** Ceftazidime/avibactam *P. aeruginosa* resistant mutants

11

## 12 ABSTRACT

13 Ceftazidime/avibactam is a combination of beta-lactam/beta-lactamases inhibitor, which  
 14 use is restricted to some clinical cases including cystic fibrosis patients infected with  
 15 multidrug resistant *Pseudomonas aeruginosa*, in which mutation is the main driver of  
 16 resistance. This study aims to predict the mechanisms of mutation-driven resistance that  
 17 are selected for when *P. aeruginosa* is challenged with either ceftazidime or  
 18 ceftazidime/avibactam. For this purpose, *P. aeruginosa* PA14 was submitted to  
 19 experimental evolution in the absence of antibiotics and in the presence of increasing  
 20 concentrations of ceftazidime or ceftazidime/avibactam for 30 consecutive days. Final  
 21 populations were analysed by whole-genome sequencing. All evolved populations  
 22 reached similar levels of ceftazidime resistance. Besides, all of them were more  
 23 susceptible to amikacin and produced pyomelanin. A first event in the evolution was the  
 24 selection of large chromosomal deletions containing *hmgA* (involved in pyomelanin  
 25 production), *galU* (involved in  $\beta$ -lactams resistance) and *mexXY-oprM* (involved in  
 26 aminoglycoside resistance). Besides mutations in *mpl* and *dacB* that regulate  $\beta$ -  
 27 lactamase expression, mutations related to MexAB-OprM overexpression were  
 28 prevalent. Ceftazidime/avibactam challenge selected mutants in the putative efflux  
 29 pump *PA14\_45890-45910* and in a two-component system (*PA14\_45870-45880*), likely  
 30 regulating its expression. All populations produce pyomelanin and were more  
 31 susceptible to aminoglycosides likely due to the selection of large chromosomal  
 32 deletions. Since pyomelanin-producing mutants, presenting similar deletions are  
 33 regularly isolated from infections, the potential aminoglycosides hyper-susceptibility and  
 34 reduced  $\beta$ -lactams susceptibility of pyomelanin-producing *P. aeruginosa* should be  
 35 taken into consideration for treating infections by these isolates.

## 36 INTRODUCTION

37 *Pseudomonas aeruginosa* is an opportunistic pathogen widely distributed in nature (1),  
 38 which is a major cause of lung and airway infections in hospitalized patients, as well as  
 39 chronic infections in patients with cystic fibrosis (CF) and chronic obstructive  
 40 pulmonary disease (2, 3). This bacterial species presents a characteristic low  
 41 susceptibility to antibiotics, including  $\beta$ -lactams, which is mainly the consequence of its  
 42 low permeability and the presence in its genome of different intrinsic resistance genes,  
 43 including those encoding multidrug (MDR) efflux pumps (4) and beta-lactamases. In  
 44 addition, an increasing number of *P. aeruginosa* isolates has acquired several resistance  
 45 genes through horizontal gene transfer (HGT), including different classes of  
 46 carbapenemases. Finally, *P. aeruginosa* is able to develop resistance through mutation,  
 47 particularly when causing chronic infections, to nearly any available antibiotic. Under  
 48 this situation, the emergence and spread of MDR resistant global clones is of special  
 49 concern (5).

50 The use of  $\beta$ -lactam/ $\beta$ -lactamase inhibitor combinations, such as amoxicillin/clavulanic  
 51 acid or ceftolozane/tazobactam, has proven to be effective against class A  $\beta$ -lactamases  
 52 (which include narrow and extended-spectrum  $\beta$ -lactamases and some  
 53 carbapenemases); whereas effective combinations against class B, C (extended  
 54 spectrum cephalosporinases) and D  $\beta$ -lactamases (6-8) have not been available until  
 55 recently. One of them is the ceftazidime/avibactam combination, whose use was  
 56 approved in 2015 by the FDA (9).

57 Avibactam, formerly known as NXL104, belongs to a new class of  $\beta$ -lactamase  
 58 inhibitors, the diazabicyclooctanes (10). This inhibitor has a potent activity against most  
 59 Class A, Class C and some Class D  $\beta$ -lactamases (11). Avibactam has been mainly used

60 for restoring the activity of the third generation cephalosporin ceftazidime (12). Thus  
61 far, it has been used for the treatment of patients with complicated urinary tract  
62 infections, including pyelonephritis; and community-acquired intra-abdominal  
63 infections, usually in combination with metronidazole (13). Besides, future studies are  
64 likely to expand the use of ceftazidime/avibactam to include other cases, such as cystic  
65 fibrosis patients with MDR resistant *P. aeruginosa* infections (13).

66 Given the fact that this treatment is currently reserved for patients who have no  
67 alternative therapeutic options, a judicious use of antibiotic stewardship should be  
68 applied in order to prevent the incidence of drug resistance. Nevertheless, and although  
69 there are numerous studies on the activity of ceftazidime/avibactam against pathogens  
70 resistant to other antibiotics (14-17), analysis for predicting potential mechanisms of  
71 resistance to this antimicrobial combination are still scarce.

72 In the present study, experimental evolution followed by whole-genome sequencing  
73 (WGS) was used to examine the evolutionary trajectories taken by *P. aeruginosa*  
74 towards resistance against the combination ceftazidime/avibactam compared to the ones  
75 followed in absence of avibactam. This may throw light upon the different mechanisms  
76 of resistance that are selected for in *P. aeruginosa* when its  $\beta$ -lactamase activity is  
77 inhibited by the presence of this novel inhibitor. In addition, the present work may  
78 allow us to elucidate whether the presence of avibactam modifies the resistance level  
79 acquired by the bacterial populations in comparison to the one developed when  
80 ceftazidime is used alone. Thus, these results may give rise to strategies for predicting,  
81 managing, and eventually reducing resistance to ceftazidime/avibactam. This is widely  
82 important, as this treatment is strictly restricted to few clinical cases in which resistant  
83 strains would be of major concern.

## 84 MATERIALS AND METHODS

### 85 Growth conditions and antibiotic susceptibility assays

86 Unless otherwise stated, bacteria were grown in Luria Bertani (LB) Broth at 37°C with  
 87 shaking at 250 rpm. The susceptibility to tigecycline, tetracycline, aztreonam,  
 88 ceftazidime, imipenem, meropenem, ciprofloxacin, levofloxacin, norfloxacin,  
 89 tobramycin, streptomycin, amikacin, gentamycin, colistin, polymyxin B,  
 90 chloramphenicol, fosfomycin and erythromycin was determined by disk diffusion in  
 91 Mueller Hinton Agar (MHA) (Sigma) at 37°C. For a set of antibiotics, MICs were  
 92 determined using E-test strips (MIC Test Strip, Liofilchem®). MICs of ceftazidime and  
 93 ceftazidime/avibactam were determined in LB by double dilution in microtiter plates.

### 94 Experimental evolution procedure

95 Twelve bacterial populations from a stock *P. aeruginosa* PA14 culture (four controls  
 96 without antibiotic, four populations challenged with ceftazidime, and four populations  
 97 challenged with ceftazidime/avibactam) were grown in parallel in LB for 30  
 98 consecutive days. Each day, the cultures were diluted (1/250) in fresh LB. The  
 99 concentrations of ceftazidime used for selection were increased over the evolution  
 100 experiment from the concentration that hinders the growth of *P. aeruginosa* PA14 under  
 101 these culture conditions (4 µg/ml) up to 128 µg/ml, doubling them every 5 days. The  
 102 avibactam concentration was maintained constant, as used in clinical tests (18), at 4  
 103 µg/ml. In some occasions, the cultures did not grow when antibiotic concentration  
 104 increased, in which case, the selection was kept at the concentration that allows growth.  
 105 Every five days, samples from each culture were preserved at -80 °C for further  
 106 research.

## 107 **Whole-genome sequencing (WGS)**

108 Gnome® DNA kit (MP Biomedicals) was used to extract genomic DNA. WGS was  
109 performed by Sistemas Genómicos S.L. The quality of the extracted material was  
110 analysed via a 4200 Tape Station, High Sensitivity assay and the DNA concentration  
111 ascertained by real-time PCR using a LightCycler 480 device (Roche). Libraries were  
112 obtained without amplification following Illumina protocols and were pair-end  
113 sequenced (100 x 2) in an Illumina HiSeq 2500 sequencer. The average number of reads  
114 per sample was 7,178,870, which represents a 200x coverage, on average.

## 115 **Bioinformatics analysis of WGS and confirmation of genetic changes**

116 Mutations in the evolved populations were identified using CLC Genomics Workbench  
117 9.0 (QIAGEN). *P. aeruginosa* UCBPP-PA14 reference chromosome (NC\_008463.1)  
118 was used to align the reads obtained from WGS data (previously trimmed). Sanger  
119 sequencing was used to verify and to settle the order of appearance of the putative  
120 mutations found via WGS (Table S1). Thirty-two pairs of primers, which amplified  
121 200-400 base pair regions containing each genetic modification, were designed (Table  
122 S2). After PCR amplification, the corresponding amplicons were purified using the  
123 QIAquick PCR Purification Kit (QIAGEN) and sequenced at GATC Biotech.

## 124 **RESULTS**

### 125 **Stepwise evolution of *P. aeruginosa* towards ceftazidime and** 126 **ceftazidime/avibactam resistance**

127 To determine the potential evolutionary trajectories that can lead to either ceftazidime or  
128 ceftazidime/avibactam resistance, four biological replicates were allowed to evolve in  
129 parallel in each of the following conditions (Figure 1): under selective pressure with

130 ceftazidime (populations 1-4), ceftazidime/avibactam (populations 5-8), and in the  
 131 absence of any selective pressure (populations 9-12). The susceptibility of each  
 132 population to the selecting antibiotic was determined every 5 days by E-test. However,  
 133 after 20 days of evolution, MICs reached the highest limits of the E-test strips and MICs  
 134 were again determined, for each evolutionary step, by double dilution (Table S3).  
 135 Stepwise evolutionary trajectories were observed for both treatments, in which the  
 136 selected populations reached quite similar levels of resistance (Figure 2). These results  
 137 suggest that avibactam inhibition may not be a guarantee of impeding *P. aeruginosa* to  
 138 acquire high-level ceftazidime resistance. An increase in the MIC of an antibiotic after  
 139 experimental evolution does not necessarily imply that antibiotic-resistant mutants have  
 140 been selected for: resistance may have arisen due to a phenotypic (inducible) adaptation  
 141 to the presence of ceftazidime rather than to mutations (19-21). To address this  
 142 possibility, the evolved populations were cultured in the absence of selection pressure  
 143 (three sequential passages on LB) and the MICs again determined. These were found  
 144 not to vary, indicating that the observed modifications were due to the selection of  
 145 stable mutants.

#### 146 **Cross-resistance and collateral sensitivity of the evolved populations**

147 Taking into consideration the few therapeutic options for patients submitted to  
 148 ceftazidime/avibactam therapy, knowing whether or not acquisition of resistance to this  
 149 combination might alter the susceptibility to other antibiotics is of crucial importance.  
 150 To that end, the susceptibility to a range of representative antibiotics was tested by disk  
 151 diffusion assay (Table S4). From these results, a set of antibiotics was chosen for  
 152 determining their MICs against the different evolved populations. Every evolved  
 153 replicate showed altered susceptibility to antimicrobials belonging to different structural

154 families (Table 1), implying that at least some resistance mutations were not  
 155 ceftazidime- or ceftazidime/avibactam-specific. All populations evolved in the presence  
 156 of either ceftazidime or ceftazidime/avibactam presented decreased susceptibility to  
 157 other  $\beta$ -lactams, to chloramphenicol and to erythromycin and they were more  
 158 susceptible to fosfomycin and to amikacin. Notably, while populations evolving in the  
 159 presence of ceftazidime were less susceptible to tetracycline and did not present changes  
 160 in the susceptibility to tigecycline, populations evolved in the presence of  
 161 ceftazidime/avibactam were hyper-susceptible to both antibiotics.

## 162 **Analysis of mutations associated with the acquisition of resistance**

163 To know the genetic events associated with the acquisition of resistance in the evolved  
 164 populations, the genomes of each, as well as that of the original PA14 strain, were  
 165 sequenced on the last day of the experiment. Table 2 encompasses the resulting mutated  
 166 genes and their functional significance, whereas Table S1 shows the locations of all 40  
 167 genetic changes that were unveiled and were not present in control populations evolving  
 168 in the absence of antibiotics. A total of 37 single nucleotide variants (SNVs) and 3  
 169 multi-nucleotide variants (MNVs; deletions and substitutions of various nucleotides)  
 170 were found, 36 located in genes and 4 in intergenic regions. Most mutations located in  
 171 genes resulted in amino acid alterations, stop codons or frameshifts. In addition, all the  
 172 populations evolved in the presence of antibiotics contained large chromosomal  
 173 deletions (55 to 443 kbp) representing from 0,88% to 7,09% of the *P. aeruginosa* PA14  
 174 genome. Five different deletions were selected, they all presenting a 55 kbp common  
 175 region (Figure 3).

176 To verify the presence and the order of appearance of the genetic changes identified by  
177 WGS, the regions holding these mutations were amplified using specific  
178 oligonucleotides (Table S2) and the amplicons Sanger-sequenced in each evolutionary  
179 step (Figure 4). Regarding the large chromosomal deletions, primers located at the  
180 flanking sequences were used to verify their presence. In all cases, these analyses  
181 confirmed the information obtained from WGS.

### 182 **Common mutations selected upon either ceftazidime or ceftazidime/avibactam** 183 **selection pressure**

184 Upon one day of experimental evolution, all *P. aeruginosa* PA14 cultures challenged  
185 with antibiotic produced a brown pigment, which appeared to be pyomelanin, whose  
186 accumulation is normally due to the lack of homogentisate 1,2-dioxygenase activity  
187 provided by the enzyme HmgA (22). All the chromosomal large deletions selected  
188 during evolution presented *hmgA* (Figure 3). In addition, the deletions included as well  
189 *galU* (involved in LPS biosynthesis), whose inactivation reduces ceftazidime  
190 susceptibility (23); and the MDR efflux pump *mexXY-oprM*, which contributes to  
191 aminoglycoside resistance in *P. aeruginosa* (24). Deletion of the latter is likely the  
192 cause of the observed amikacin hyper-susceptibility of all evolved populations (Table  
193 1).

194 Another common element in both evolutions is *nalD*, which encodes a secondary  
195 repressor of MexAB-OprM (25, 26). Three out of eight replicates showed the same  
196 T11N change, which has been previously found in XDR *P. aeruginosa* high-risk clones  
197 (27) that overexpress MexAB-OprM. Notably, four replicates (including the three  
198 presenting mutations in *nalD*) also presented mutations in *mexB*, indicating this efflux  
199 system to be a relevant element in the acquisition of resistance. Two other elements that

are selected for in both treatments are *ftsI* and *clpA*. The first encodes PBP3, the target of different  $\beta$ -lactams (28, 29), which has been already found to be mutated in numerous resistant *P. aeruginosa* isolates. Indeed, the mutations R504C/H found in populations 1 and 5 are also present among isolates from widespread nosocomial *P. aeruginosa* clones (29-31). *clpA* encodes for an intracellular protease involved in different aspects of *P. aeruginosa* physiology, in addition to aztreonam resistance (28, 32).

### **Mutations selected by ceftazidime**

In addition to the observed mutations in *nalD*, which would allow *mexAB-oprM* overexpression, we found as well mutations that should lead to the overexpression of this system in the populations evolving under ceftazidime challenge. Two populations carried mutants in *mexR*, which encodes a local repressor of *mexAB-oprM* expression. Another population presented a mutation upstream *mexA* that might prevent the interaction of NalD with its operator (25), thus allowing *mexAB-oprM* overexpression.

Other mutations specifically selected for by ceftazidime were found in *mpl* and *dacB*. The proteins encoded by these genes are involved in the recycling of peptidoglycan muropeptides. Besides, they control the activity of AmpR and consequently the level of AmpC expression (23, 33), which is known to be a main element in *P. aeruginosa* resistance to  $\beta$ -lactams. Interestingly, *mpl* V124G (replicate 2, Table S1) has been found before in a clinical isolate (*P. aeruginosa* NCGM1984). These finding, along with the *ftsI* and *nalD* mutations aforementioned, validate our experimental evolution approach as a valuable predictive model for the *in vivo* selection of antibiotic resistance.

222 Finally, mutations at *orfN*, *pitA*, *infB*, *grpE*, *clpP* and *dnaK* were selected for in  
 223 populations challenged with ceftazidime. *orfN* codes for a putative glycosyl transferase  
 224 of type A flagellins (34). Mutations on this gene have been found in ciprofloxacin *P.*  
 225 *aeruginosa* resistant strains (35), and also in *P. aeruginosa* populations submitted to  
 226 tigecycline and tobramycin experimental evolutions (Sanz-García *et al.* submitted).  
 227 *pitA* encodes a phosphate transporter, *infB* the translation initiation factor IF-2 and  
 228 *dnaK*, *grpE* and *clpP* encode proteins involved in regulatory gene networks involved in  
 229 response to stress. None of them has been previously related to ceftazidime resistance,  
 230 excepting *dnaK*, whose inactivation leads to stronger susceptibility to various  
 231 antimicrobials in *Escherichia coli* (36).

#### 232 **Mutations selected by ceftazidime/avibactam**

233 The challenge with ceftazidime/avibactam selected mutants in a predicted efflux pump  
 234 (*PA14\_45890-45910*), as well as in the two-components system (TCS) encoded by the  
 235 operon *PA14\_45870-45880*, likely regulating its expression. Previous studies have  
 236 shown this efflux pump to be involved in *P. aeruginosa* intrinsic resistance (37) and  
 237 susceptibility to carbapenems (38). Regarding the substrate recognition profile this  
 238 pump might display, it is remarkable that populations 5 and 7, which present the  
 239 aforementioned mutations, show a much lower susceptibility to imipenem than any  
 240 other replicate (Table 1), suggesting this pump to have certain specificity to  
 241 carbapenems.

242 Other mutations that were selected upon ceftazidime/avibactam treatment were found in  
 243 *pepA*, *spoT*, *dnaJ* and *flgF*. *pepA* encodes for a protease necessary for *P. aeruginosa*  
 244 cytotoxicity, virulence and, consequently, lung infection (39, 40). Although its  
 245 implication in antibiotic resistance has not been studied in detail, it has been reported

246 that its inactivation confers meropenem resistance in *P. aeruginosa* (41). Moreover,  
247 *pepA* mutants are selected in the presence of aztreonam (28). SpoT has been related to  
248 piperacillin resistance (42); while DnaJ, a chaperone protein and FlgF, a flagellar basal  
249 body rod protein (43), have been reported to modify the susceptibility of *E. coli* to a  
250 range of antibiotics when they are inactivated (36).

251 The other mutations that were selected for in populations under ceftazidime/avibactam  
252 challenge; namely those occurring in *ctpA*, an essential gene for the transition between  
253 acute and chronic *P. aeruginosa* infection (44), *pcm*, that encodes for a L-isoaspartate  
254 carboxylmethyltransferase type II that participates in protein repair and degradation and  
255 *glnD*, which is implicated in N<sub>2</sub> metabolism, (45) have not been reported to be involved  
256 in antibiotic resistance.

## 257 Discussion

258 The use of  $\beta$ -lactamase inhibitors has re-emerged as a fruitful strategy for fighting  
259 infections by MDR bacteria. Among them, ceftazidime/avibactam can be a useful  
260 combination for treating infections by different organisms, including *P. aeruginosa*. The  
261 analysis of the mechanisms of resistance to previous  $\beta$ -lactam/ $\beta$ -lactamase inhibitor  
262 combinations as amoxicillin/clavulanate have shown that the main mechanisms selected  
263 along their use have been increased expression or mutation of pre-existing  $\beta$ -lactamases  
264 and acquisition of new ones by HGT (46-50). *P. aeruginosa* has already acquired  
265 different carbapenemases that might be important elements in ceftazidime/avibactam  
266 resistance. In addition, resistance can be achieved through mutations, particularly in the  
267 case of *P. aeruginosa* causing chronic infections. To identify potential mutations  
268 involved in the acquisition of either ceftazidime or ceftazidime/avibactam resistance,  
269 bacterial populations were submitted to increasing selective concentrations of these

antimicrobials. In both cases, the first event in the evolution seems to be the deletion of large regions of *P. aeruginosa* chromosome that comprise, among several other genes, *hmgA*, *galU* and *mexXY*. A similar situation has been previously reported in other *P. aeruginosa* experimental evolution assays in the presence of  $\beta$ -lactams, such as piperacillin (42) and meropenem (51). Additionally, pyomelanin-producing mutants are regularly isolated from infections; up to 13% of CF patients harbour pyomelanin-producing mutants (52), likely because the production of pyomelanin increases resistance to oxidative stress and persistence in chronic lung infections (22). Recent work has also shown that these mutations can be selected to prevent bacteriophage predation (53). Notably, melanogenic clinical isolates of *P. aeruginosa* present large chromosomal deletions, similar to those reported in the present work (54). Our results then support that ceftazidime selects for these genome deletions, and the presence of avibactam cannot prevent them from happening. It might be possible that deletions are the consequence of increased recombination triggered by the presence of the antibiotic. However, the fact that *P. aeruginosa* evolving in the presence of ciprofloxacin do not produce pyomelanin (a marker of these deletions) and that pyomelanin-producing mutants are selected when a *recA* *P. aeruginosa* defective strain is challenged with either ceftazidime or ceftazidime/avibactam (data not shown), goes against this possibility. Besides the already known effect of the lack of *galU* on the susceptibility to  $\beta$ -lactams, the absence of other genes located in the deletion, such as *mexXY*, may affect *P. aeruginosa* susceptibility to antibiotics. Deletion of this pump is likely the cause of the observed hyper-susceptibility to amikacin of the evolved populations. In addition, it might have an indirect effect on the decreased susceptibility to beta-lactams, particularly in the case of those strains carrying mutations in the repressors of *mexAB-oprM*.

294 MexAB-OprM is an important determinant of intrinsic *P. aeruginosa* resistance to  
 295 different antibiotics, including  $\beta$ -lactams (24). Further, mutants overexpressing this  
 296 efflux pump are regularly isolated from infections and it has been shown its expression  
 297 to be prevalent among resistant *P. aeruginosa* clinical isolates (55-58). MexAB and  
 298 MexXY share the outer membrane protein OprM, which produces antagonistic  
 299 interactions when both systems are expressed (51, 59). Hence, MexXY-OprM  
 300 elimination might favour the efficiency of  $\beta$ -lactams efflux, reducing the competition of  
 301 both efflux pumps for OprM.

302 Important elements in the acquisition of ceftazidime resistance are efflux pumps,  
 303 particularly MexAB-OprM, since mutations either in the elements regulating its  
 304 expression or in the efflux pump itself were found in six out of eight evolved  
 305 populations, whereas the two remaining populations harboured mutants in the putative  
 306 *PA14\_45890-45910* and in its potential TCS regulator. While the substrates of MexAB-  
 307 OprM are known and include  $\beta$ -lactams, the substrates of *PA14\_4590-45910* are  
 308 unknown. Nevertheless, it is remarkable that populations presenting mutations on this  
 309 determinant display a much lower susceptibility to imipenem than any other replicate,  
 310 suggesting this pump to have certain specificity to  $\beta$ -lactams.

311 Mutations in elements involved in the regulation of AmpC expression were selected  
 312 when just ceftazidime was used for selection and not in the presence of  
 313 ceftazidime/avibactam. This suggests that, at least in the *P. aeruginosa* PA14  
 314 background, the efficient inhibition by avibactam of intrinsic  $\beta$ -lactamases, preclude the  
 315 emergence of mechanisms based on their overexpression and other mechanisms,  
 316 including the above mentioned large deletions and modifications in the activity of efflux  
 317 pumps are preferentially selected. This does not necessarily mean that resistance to

318 ceftazidime/avibactam cannot be associated to changes in the activity of AmpC,  
319 particularly if the challenged isolate is already resistant to ceftazidime. Indeed,  
320 avibactam resistant mutants presenting changes in the avibactam binding pocket of  
321 AmpC are selected *in vitro* at low frequency from Amp C-overexpressing ceftazidime  
322 resistant *P. aeruginosa* isolates (60).

323 Although most of the mutants here reported have been previously associated to be  
324 involved in antibiotic resistance, it is still possible that some of the mutations might be  
325 selected for compensating the fitness costs associated with the acquisition of resistance.  
326 This might be the case of *ctpA*, *pcm* or the mutations at structural elements of efflux  
327 pumps that were selected after mutations in the regulators of their expression. For the  
328 latter, it might also be possible that these mutations increase the capability of extruding  
329 the antibiotic substrates, as described for AcrB (61). The fact that in all evolved  
330 populations mutants in efflux pumps are selected, provides an explanation of the cross-  
331 resistance phenotype observed in all resistant strains. This situation might be of  
332 concern, since both ceftazidime and ceftazidime/avibactam might select for resistance to  
333 other antibiotics, at least along chronic infections in which mutation is the main cause of  
334 acquisition of resistance.

335 *P. aeruginosa* evolution in chronic infections frequently involves large genome  
336 deletions (62), usually linked to the production of pyomelanin (54). Whether these  
337 deletions are selected by antibiotic treatment or are just the consequence of the  
338 adaptation to the environment of the lungs of the CF patient remains to be established.  
339 However, this evolution provides a link between antibiotic resistance and virulence for  
340 this relevant pathogen. In any case, and given that deletions containing *galU* and *hmgA*  
341 appear to be a first step on the evolution towards ceftazidime/avibactam resistance,

pyomelanin production could be considered as a marker in the selection of the antibiotic of choice for treating *P. aeruginosa* infections. Both *in vitro* work, including the results here shown, and the analysis of clinical pyomelanin-producers, have shown that these isolates are hyper-susceptible to aminoglycosides probably because the deletions they present include *mexXY*. It would then be judicious using aminoglycosides, and not  $\beta$ -lactams for treating infections by pyomelanin-producing *P. aeruginosa*.

### Acknowledgments

Work in our laboratory is supported by grants from the Instituto de Salud Carlos III (Spanish Network for Research on Infectious Diseases [RD16/0016/0011]), from the Spanish Ministry of Economy and Competitiveness (BIO2017-83128-R) and from the Autonomous Community of Madrid (B2017/BMD-3691). The funders had no role in study design, data collection and interpretation, or the decision to submit the work for publication. FSG is the recipient of a FPU fellowship.

### REFERENCES

1. Silby MW, Winstanley C, Godfrey SA, Levy SB, Jackson RW. 2011. *Pseudomonas* genomes: diverse and adaptable. *FEMS Microbiol Rev* 35:652-80.
2. Martinez-Solano L, Macia MD, Fajardo A, Oliver A, Martinez JL. 2008. Chronic *Pseudomonas aeruginosa* infection in chronic obstructive pulmonary disease. *Clinical Infectious Diseases* 47:1526-33.
3. Talwalkar JS, Murray TS. 2016. The Approach to *Pseudomonas aeruginosa* in Cystic Fibrosis. *Clin Chest Med* 37:69-81.
4. Vila J, Martínez JL. 2008. Clinical impact of the over-expression of efflux pump in nonfermentative Gram-negative bacilli, development of efflux pump inhibitors. *Current drug targets* 9:797-807.
5. Oliver A, Mulet X, Lopez-Causape C, Juan C. 2015. The increasing threat of *Pseudomonas aeruginosa* high-risk clones. *Drug Resist Updat* 21-22:41-59.
6. Tzouveleakis LS, Markogiannakis A, Psychogiou M, Tassios PT, Daikos GL. 2012. Carbapenemases in *Klebsiella pneumoniae* and other Enterobacteriaceae: an evolving crisis of global dimensions. *Clin Microbiol Rev* 25:682-707.
7. Woodford N, Turton JF, Livermore DM. 2011. Multiresistant Gram-negative bacteria: the role of high-risk clones in the dissemination of antibiotic resistance. *FEMS Microbiol Rev* 35:736-55.
8. Buynak JD. 2006. Understanding the longevity of the beta-lactam antibiotics and of antibiotic/beta-lactamase inhibitor combinations. *Biochem Pharmacol* 71:930-40.

9. Liscio JL, Mahoney MV, Hirsch EB. 2015. Ceftolozane/tazobactam and ceftazidime/avibactam: two novel beta-lactam/beta-lactamase inhibitor combination agents for the treatment of resistant Gram-negative bacterial infections. *Int J Antimicrob Agents* 46:266-71.
10. Coleman K. 2011. Diazabicyclooctanes (DBOs): a potent new class of non-beta-lactam beta-lactamase inhibitors. *Curr Opin Microbiol* 14:550-5.
11. Aktas Z, Kayacan C, Oncul O. 2012. In vitro activity of avibactam (NXL104) in combination with beta-lactams against Gram-negative bacteria, including OXA-48 beta-lactamase-producing *Klebsiella pneumoniae*. *Int J Antimicrob Agents* 39:86-9.
12. Hayes MV, Orr DC. 1983. Mode of action of ceftazidime: affinity for the penicillin-binding proteins of *Escherichia coli* K12, *Pseudomonas aeruginosa* and *Staphylococcus aureus*. *J Antimicrob Chemother* 12:119-26.
13. Hidalgo JA, Vinluan CM, Antony N. 2016. Ceftazidime/avibactam: a novel cephalosporin/nonbeta-lactam beta-lactamase inhibitor for the treatment of complicated urinary tract infections and complicated intra-abdominal infections. *Drug Des Devel Ther* 10:2379-86.
14. Pitart C, Marco F, Keating TA, Nichols WW, Vila J. 2015. Activity of ceftazidime-avibactam against fluoroquinolone-resistant Enterobacteriaceae and *Pseudomonas aeruginosa*. *Antimicrob Agents Chemother* 59:3059-65.
15. Calvopina K, Hinchliffe P, Brem J, Heesom KJ, Johnson S, Cain R, Lohans CT, Fishwick CWG, Schofield CJ, Spencer J, Avison MB. 2017. Structural/mechanistic insights into the efficacy of nonclassical beta-lactamase inhibitors against extensively drug resistant *Stenotrophomonas maltophilia* clinical isolates. *Mol Microbiol* 106:492-504.
16. Lopez-Hernandez I, Alonso N, Fernandez-Martinez M, Zamorano L, Rivera A, Oliver A, Conejo MC, Martinez-Martinez L, Navarro F, Pascual A. 2017. Activity of ceftazidime-avibactam against multidrug-resistance Enterobacteriaceae expressing combined mechanisms of resistance. *Enferm Infecc Microbiol Clin* 35:499-504.
17. Fraile-Ribot PA, Cabot G, Mulet X, Perianez L, Martin-Pena ML, Juan C, Perez JL, Oliver A. 2017. Mechanisms leading to in vivo ceftolozane/tazobactam resistance development during the treatment of infections caused by MDR *Pseudomonas aeruginosa*. *J Antimicrob Chemother* doi:10.1093/jac/dkx424.
18. Zhanel GG, Lawson CD, Adam H, Schweizer F, Zelenitsky S, Lagace-Wiens PR, Denisuk A, Rubinstein E, Gin AS, Hoban DJ, Lynch JP, 3rd, Karlowsky JA. 2013. Ceftazidime-avibactam: a novel cephalosporin/beta-lactamase inhibitor combination. *Drugs* 73:159-77.
19. Levin BR, Rozen DE. 2006. Non-inherited antibiotic resistance. *Nat Rev Microbiol* 4:556-62.
20. Martinez JL, Rojo F. 2011. Metabolic regulation of antibiotic resistance. *FEMS Microbiol Rev* 35:768-89.
21. Martinez JL, Fajardo A, Garmendia L, Hernandez A, Linares JF, Martinez-Solano L, Sanchez MB. 2009. A global view of antibiotic resistance. *FEMS Microbiol Rev* 33:44-65.
22. Rodriguez-Rojas A, Mena A, Martin S, Borrell N, Oliver A, Blazquez J. 2009. Inactivation of the hmgA gene of *Pseudomonas aeruginosa* leads to pyomelanin hyperproduction, stress resistance and increased persistence in chronic lung infection. *Microbiology* 155:1050-7.
23. Alvarez-Ortega C, Wiegand I, Olivares J, Hancock RE, Martinez JL. 2010. Genetic determinants involved in the susceptibility of *Pseudomonas aeruginosa* to beta-lactam antibiotics. *Antimicrob Agents Chemother* 54:4159-67.
24. Masuda N, Sakagawa E, Ohya S, Gotoh N, Tsujimoto H, Nishino T. 2000. Substrate specificities of MexAB-OprM, MexCD-OprJ, and MexXY-oprM efflux pumps in *Pseudomonas aeruginosa*. *Antimicrob Agents Chemother* 44:3322-7.

25. Morita Y, Cao L, Gould VC, Avison MB, Poole K. 2006. *nalD* encodes a second repressor of the *mexAB-oprM* multidrug efflux operon of *Pseudomonas aeruginosa*. J Bacteriol 188:8649-54.

26. Sobel ML, Hocquet D, Cao L, Plesiat P, Poole K. 2005. Mutations in PA3574 (*nalD*) lead to increased MexAB-OprM expression and multidrug resistance in laboratory and clinical isolates of *Pseudomonas aeruginosa*. Antimicrob Agents Chemother 49:1782-6.

27. Cabot G, Ocampo-Sosa AA, Dominguez MA, Gago JF, Juan C, Tubau F, Rodriguez C, Moya B, Pena C, Martinez-Martinez L, Oliver A, Spanish Network for Research in Infectious D. 2012. Genetic markers of widespread extensively drug-resistant *Pseudomonas aeruginosa* high-risk clones. Antimicrob Agents Chemother 56:6349-57.

28. Jorth P, McLean K, Ratjen A, Secor PR, Bautista GE, Ravishankar S, Rezayat A, Garudathri J, Harrison JJ, Harwood RA, Penewit K, Waalkes A, Singh PK, Salipante SJ. 2017. Evolved Aztreonam Resistance Is Multifactorial and Can Produce Hypervirulence in *Pseudomonas aeruginosa*. MBio 8.

29. Cabot G, Lopez-Causape C, Ocampo-Sosa AA, Sommer LM, Dominguez MA, Zamorano L, Juan C, Tubau F, Rodriguez C, Moya B, Pena C, Martinez-Martinez L, Plesiat P, Oliver A. 2016. Deciphering the Resistome of the Widespread *Pseudomonas aeruginosa* Sequence Type 175 International High-Risk Clone through Whole-Genome Sequencing. Antimicrob Agents Chemother 60:7415-7423.

30. Lopez-Causape C, Sommer LM, Cabot G, Rubio R, Ocampo-Sosa AA, Johansen HK, Figuerola J, Canton R, Kidd TJ, Molin S, Oliver A. 2017. Evolution of the *Pseudomonas aeruginosa* mutational resistome in an international Cystic Fibrosis clone. Sci Rep 7:5555.

31. Kos VN, Deraspe M, McLaughlin RE, Whiteaker JD, Roy PH, Alm RA, Corbeil J, Gardner H. 2015. The resistome of *Pseudomonas aeruginosa* in relationship to phenotypic susceptibility. Antimicrob Agents Chemother 59:427-36.

32. Fernandez L, Breidenstein EB, Song D, Hancock RE. 2012. Role of intracellular proteases in the antibiotic resistance, motility, and biofilm formation of *Pseudomonas aeruginosa*. Antimicrob Agents Chemother 56:1128-32.

33. Aguilera Rossi CG, Gomez-Puertas P, Ayala Serrano JA. 2016. In vivo functional and molecular characterization of the Penicillin-Binding Protein 4 (DacB) of *Pseudomonas aeruginosa*. BMC Microbiol 16:234.

34. Schirm M, Arora SK, Verma A, Vinogradov E, Thibault P, Ramphal R, Logan SM. 2004. Structural and genetic characterization of glycosylation of type a flagellin in *Pseudomonas aeruginosa*. J Bacteriol 186:2523-31.

35. Wong A, Rodrigue N, Kassen R. 2012. Genomics of adaptation during experimental evolution of the opportunistic pathogen *Pseudomonas aeruginosa*. PLoS Genet 8:e1002928.

36. Liu A, Tran L, Becket E, Lee K, Chinn L, Park E, Tran K, Miller JH. 2010. Antibiotic sensitivity profiles determined with an *Escherichia coli* gene knockout collection: generating an antibiotic bar code. Antimicrob Agents Chemother 54:1393-403.

37. Fajardo A, Martinez-Martin N, Mercadillo M, Galan JC, Ghysels B, Matthijs S, Cornelis P, Wiehlmann L, Tummler B, Baquero F, Martinez JL. 2008. The neglected intrinsic resistome of bacterial pathogens. PLoS ONE 3:e1619.

38. Kohler T, Michea-Hamzehpour M, Epp SF, Pechere JC. 1999. Carbapenem activities against *Pseudomonas aeruginosa*: respective contributions of OprD and efflux systems. Antimicrob Agents Chemother 43:424-7.

39. Hauser AR, Kang PJ, Engel JN. 1998. *PepA*, a secreted protein of *Pseudomonas aeruginosa*, is necessary for cytotoxicity and virulence. Mol Microbiol 27:807-18.

472 40. Potvin E, Lehoux DE, Kukavica-Ibrulj I, Richard KL, Sanschagrin F, Lau GW, Levesque RC.  
473 2003. In vivo functional genomics of *Pseudomonas aeruginosa* for high-throughput screening  
474 of new virulence factors and antibacterial targets. *Environ Microbiol* 5:1294-308.

475 41. Isabella VM, Campbell AJ, Manchester J, Sylvester M, Nayar AS, Ferguson KE, Tommasi  
476 R, Miller AA. 2015. Toward the rational design of carbapenem uptake in *Pseudomonas*  
477 *aeruginosa*. *Chem Biol* 22:535-547.

478 42. Yen P, Papin JA. 2017. History of antibiotic adaptation influences microbial  
479 evolutionary dynamics during subsequent treatment. *PLoS Biol* 15:e2001586.

480 43. Homma M, Kutsukake K, Hasebe M, Iino T, Macnab RM. 1990. FlgB, FlgC, FlgF and FlgG.  
481 A family of structurally related proteins in the flagellar basal body of *Salmonella typhimurium*.  
482 *J Mol Biol* 211:465-77.

483 44. Seo J, Darwin AJ. 2013. The *Pseudomonas aeruginosa* periplasmic protease CtpA can  
484 affect systems that impact its ability to mount both acute and chronic infections. *Infect Immun*  
485 81:4561-70.

486 45. Contreras A, Drummond M, Bali A, Blanco G, Garcia E, Bush G, Kennedy C, Merrick M.  
487 1991. The product of the nitrogen fixation regulatory gene *nfrX* of *Azotobacter vinelandii* is  
488 functionally and structurally homologous to the uridylyltransferase encoded by *glnD* in enteric  
489 bacteria. *J Bacteriol* 173:7741-9.

490 46. Reading C, Cole M. 1977. Clavulanic acid: a beta-lactamase-inhibiting beta-lactam from  
491 *Streptomyces clavuligerus*. *Antimicrob Agents Chemother* 11:852-7.

492 47. Baquero F, Reig M. 1989. Mechanisms of antimicrobial resistance in anaerobic  
493 bacteria: the predictive approach. *Scand J Infect Dis Suppl* 62:25-8.

494 48. Blazquez J, Baquero MR, Canton R, Alos I, Baquero F. 1993. Characterization of a new  
495 TEM-type beta-lactamase resistant to clavulanate, sulbactam, and tazobactam in a clinical  
496 isolate of *Escherichia coli*. *Antimicrob Agents Chemother* 37:2059-63.

497 49. Canton R, Gonzalez-Alba JM, Galan JC. 2012. CTX-M Enzymes: Origin and Diffusion.  
498 *Front Microbiol* 3:110.

499 50. Toussaint KA, Gallagher JC. 2015. beta-lactam/beta-lactamase inhibitor combinations:  
500 from then to now. *Ann Pharmacother* 49:86-98.

501 51. Cabot G, Zamorano L, Moya B, Juan C, Navas A, Blazquez J, Oliver A. 2016. Evolution of  
502 *Pseudomonas aeruginosa* Antimicrobial Resistance and Fitness under Low and High Mutation  
503 Rates. *Antimicrob Agents Chemother* 60:1767-78.

504 52. Mayer-Hamblett N, Rosenfeld M, Gibson RL, Ramsey BW, Kulasekara HD, Retsch-  
505 Bogart GZ, Morgan W, Wolter DJ, Pope CE, Houston LS, Kulasekara BR, Khan U, Burns JL, Miller  
506 SI, Hoffman LR. 2014. *Pseudomonas aeruginosa* in vitro phenotypes distinguish cystic fibrosis  
507 infection stages and outcomes. *Am J Respir Crit Care Med* 190:289-97.

508 53. Shen M, Zhang H, Shen W, Zou Z, Lu S, Li G, He X, Agnello M, Shi W, Hu F, Le S. 2018.  
509 *Pseudomonas aeruginosa* MutL promotes large chromosomal deletions through non-  
510 homologous end joining to prevent bacteriophage predation. *Nucleic Acids Research* 46:4505-  
511 4514.

512 54. Hocquet D, Petitjean M, Rohmer L, Valot B, Kulasekara HD, Bedel E, Bertrand X, Plesiat  
513 P, Kohler T, Pantel A, Jacobs MA, Hoffman LR, Miller SI. 2016. Pyomelanin-producing  
514 *Pseudomonas aeruginosa* selected during chronic infections have a large chromosomal  
515 deletion which confers resistance to pyocins. *Environ Microbiol* 18:3482-3493.

516 55. Chalhoub H, Saenz Y, Rodriguez-Villalobos H, Denis O, Kahl BC, Tulkens PM, Van  
517 Bambeke F, Pan YP, Xu YH, Wang ZX, Fang YP, Shen JL, Riou M, Avrain L, Carbonnelle S, El  
518 Garch F, Pirnay JP, De Vos D, Plesiat P, Tulkens PM, Van Bambeke F, Castanheira M, Mills JC,  
519 Farrell DJ, Jones RN. High-level resistance to meropenem in clinical isolates of *Pseudomonas*  
520 *aeruginosa* in the absence of carbapenemases: role of active efflux and porin alterations

521 Overexpression of MexAB-OprM efflux pump in carbapenem-resistant *Pseudomonas*  
522 *aeruginosa*

523 Increase of efflux-mediated resistance in *Pseudomonas aeruginosa* during antibiotic treatment  
524 in patients suffering from nosocomial pneumonia

525 Mutation-driven beta-lactam resistance mechanisms among contemporary ceftazidime-  
526 nonsusceptible *Pseudomonas aeruginosa* isolates from U.S. hospitals.

527 56. Pan YP, Xu YH, Wang ZX, Fang YP, Shen JL. Overexpression of MexAB-OprM efflux  
528 pump in carbapenem-resistant *Pseudomonas aeruginosa*.

529 57. Riou M, Avrain L, Carboneille S, El Garch F, Pirnay JP, De Vos D, Plesiat P, Tulkens PM,  
530 Van Bambeke F. Increase of efflux-mediated resistance in *Pseudomonas aeruginosa* during  
531 antibiotic treatment in patients suffering from nosocomial pneumonia.

532 58. Castanheira M, Mills JC, Farrell DJ, Jones RN. Mutation-driven beta-lactam resistance  
533 mechanisms among contemporary ceftazidime-nonsusceptible *Pseudomonas aeruginosa*  
534 isolates from U.S. hospitals.

535 59. Mulet X, Moya B, Juan C, Macia MD, Perez JL, Blazquez J, Oliver A. 2011. Antagonistic  
536 interactions of *Pseudomonas aeruginosa* antibiotic resistance mechanisms in planktonic but  
537 not biofilm growth. *Antimicrob Agents Chemother* 55:4560-8.

538 60. Lahiri SD, Walkup GK, Whiteaker JD, Palmer T, McCormack K, Tanudra MA, Nash TJ,  
539 Thresher J, Johnstone MR, Hajec L, Livchak S, McLaughlin RE, Alm RA. 2015. Selection and  
540 molecular characterization of ceftazidime/avibactam-resistant mutants in *Pseudomonas*  
541 *aeruginosa* strains containing derepressed AmpC. *J Antimicrob Chemother* 70:1650-8.

542 61. Blair JM, Bavro VN, Ricci V, Modi N, Cacciottolo P, Kleinekathfer U, Ruggerone P, Vargiu  
543 AV, Baylay AJ, Smith HE, Brandon Y, Galloway D, Piddock LJ. 2015. AcrB drug-binding pocket  
544 substitution confers clinically relevant resistance and altered substrate specificity. *Proc Natl*  
545 *Acad Sci U S A* 112:3511-6.

546 62. Rau MH, Marvig RL, Ehrlich GD, Molin S, Jelsbak L. 2012. Deletion and acquisition of  
547 genomic content during early stage adaptation of *Pseudomonas aeruginosa* to a human host  
548 environment. *Environ Microbiol* 14:2200-11.

549 63. Alvarez-Ortega C, Wiegand I, Olivares J, Hancock RE, Martinez JL. 2011. The intrinsic  
550 resistome of *Pseudomonas aeruginosa* to beta-lactams. *Virulence* 2:144-6.

551

**Table 1 | MICs (µg/ml) of antibiotics of different structural families in the populations evolved in the presence of either cefatzidime or ceftazidime/avibactam.**

| Replicate   | Tgc  | Tet | Atm  | Ipm  | Mer  | Caz  | Cza  | Nor  | Ak   | C    | E    | F   |
|-------------|------|-----|------|------|------|------|------|------|------|------|------|-----|
| <b>PA14</b> | 2    | 12  | 1.5  | 0.5  | 0.19 | 1    | 1    | 0.25 | 1.5  | 24   | 32   | 16  |
| <b>1</b>    | 2    | 32  | ≥256 | 8    | 32   | ≥256 | ≥256 | 1.5  | 1    | ≥256 | ≥256 | 4   |
| <b>2</b>    | 1.5  | 24  | ≥256 | 4    | 32   | ≥256 | ≥256 | 1    | 0.5  | ≥256 | ≥256 | 1.5 |
| <b>3</b>    | 2    | 16  | ≥256 | 2    | 32   | ≥256 | ≥256 | 1    | 0.75 | ≥256 | ≥256 | 4   |
| <b>4</b>    | 2    | 16  | ≥256 | 3    | 32   | ≥256 | ≥256 | 1    | 0.5  | ≥256 | ≥256 | 2   |
| <b>5</b>    | 0.75 | 4   | ≥256 | 32   | 32   | ≥256 | ≥256 | 0.25 | 0.75 | ≥256 | ≥256 | 3   |
| <b>6</b>    | 0.5  | 4   | ≥256 | 3    | 16   | ≥256 | ≥256 | 0.25 | 1    | ≥256 | ≥256 | 4   |
| <b>7</b>    | 0.38 | 4   | 96   | 32   | 32   | ≥256 | ≥256 | 0.25 | 2    | ≥256 | ≥256 | 6   |
| <b>8</b>    | 0.75 | 8   | ≥256 | 4    | 32   | ≥256 | ≥256 | 0.75 | 0.75 | ≥256 | ≥256 | 4   |
| <b>9</b>    | 3    | 12  | 1.5  | 0.75 | 0.25 | 1    | 1    | 0.25 | 1.5  | 24   | 32   | 24  |
| <b>10</b>   | 3    | 12  | 1.5  | 0.5  | 0.19 | 1    | 1    | 0.25 | 1.5  | 24   | 32   | 24  |
| <b>11</b>   | 3    | 12  | 1    | 0.75 | 0.25 | 1    | 1    | 0.25 | 1.5  | 24   | 32   | 16  |
| <b>12</b>   | 3    | 16  | 1    | 0.75 | 0.25 | 1    | 1    | 0.38 | 1.5  | 24   | 32   | 12  |

556 Populations challenged with ceftazidime: 1-4, ceftazidime/avibactam: 5-8, and controls:  
 557 9-12. Tgc: tigecycline, tet: tetracycline, atm: aztreonam, caz: ceftazidime, cza:  
 558 ceftazidime+avibactam, ipm: imipenem, mer: meropenem, nor: norfloxacin, ak:  
 559 amikacin, c: chloramphenicol, e: erythromycin, f: fosfomycin.

560 **Table 2 | Mutated genes in ceftazidime and ceftazidime/avibactam evolved populations.**

| Treatment              | Gene name            | Functional classification                      | Replicates | Previous described effect in antibiotics' susceptibility                 | References |
|------------------------|----------------------|------------------------------------------------|------------|--------------------------------------------------------------------------|------------|
| <b>BOTH TREATMENTS</b> | <i>nalD</i>          | Efflux regulation                              | 4, 6, 8    | Quinolones, macrolides, tetracyclines, chloramphenicol, $\beta$ -lactams | (25-27)    |
|                        | <i>mexB</i>          | Efflux component                               | 1, 3, 6, 8 | Quinolones, macrolides, tetracyclines, chloramphenicol, $\beta$ -lactams | (24)       |
|                        | <i>ftsI</i>          | Penicillin binding protein                     | 1, 5, 8    | $\beta$ -lactams                                                         | (28-31)    |
|                        | <i>clpA</i>          | Protease activity                              | 1, 5       | Aztreonam                                                                | (28)       |
|                        | <i>mexR</i>          | Efflux regulation                              | 1, 3       | Quinolones, macrolides, tetracyclines, chloramphenicol, $\beta$ -lactams | (24)       |
|                        | Upstream <i>mexA</i> | Efflux regulation                              | 2          | Quinolones, macrolides, tetracyclines, chloramphenicol, $\beta$ -lactams | (24)       |
|                        | <i>mpl</i>           | Peptidoglycan metabolism ( $\beta$ -lactamase) | 2, 4       | $\beta$ -lactams                                                         | (23, 63)   |

|                                         |             |                            |      |                                        |                              |
|-----------------------------------------|-------------|----------------------------|------|----------------------------------------|------------------------------|
| <b>CEFTAZIDIME<br/>(1-4)</b>            | <i>orfN</i> | Flagellin glycolysation    | 2    | Ciprofloxacin, tigecycline, tobramycin | (35) (Sanz et al. submitted) |
|                                         | <i>infB</i> | Translation factor         | 2    | -                                      | -                            |
|                                         | <i>pitA</i> | Phosphate transport        | 2, 4 | -                                      | -                            |
|                                         | <i>grpE</i> | Heat shock protein         | 3    | -                                      | -                            |
|                                         | <i>clpP</i> | Protease activity          | 3    | -                                      | -                            |
|                                         | <i>dnaK</i> | Chaperone                  | 3    | Several antibiotics                    | (36)                         |
|                                         | <i>dacB</i> | Penicillin binding protein | 4    | β-lactams                              | (33)                         |
|                                         | <i>dnaJ</i> | Chaperone                  | 5    | Triclosan                              | (36)                         |
|                                         | <i>pepA</i> | Protease activity          | 6    | Meropenem, aztreonam                   | (28, 41)                     |
|                                         | <i>ctpA</i> | Protease activity          | 6    | -                                      | -                            |
| <b>CEFTAZIDIME<br/>+ AVIBACTAM(5-8)</b> | <i>glnD</i> | N <sub>2</sub> metabolism  | 6    | Aminoglycosides, cephradine            | (36)                         |
|                                         | <i>flgF</i> | Flagellar component        | 6    | Cephradine, cefoxitin, chloramphenicol | (36)                         |
|                                         | <i>pcm</i>  | Protein repair/degradation | 8    | -                                      | -                            |

|                   |                    |      |              |          |
|-------------------|--------------------|------|--------------|----------|
| <i>spoT</i>       | Stringent response | 8    | Piperacillin | (42)     |
| <i>PA14_45870</i> | TCS sensor         | 5    | Carbapenems  | (37, 38) |
| <i>PA14_45880</i> | TCS regulator      | 7    | Carbapenems  | (37, 38) |
| <i>PA14_45890</i> | Efflux component   | 5, 7 | Carbapenems  | (37, 38) |

561 The table shows previously described effects in the susceptibility to antibiotics of mutations in the genes that appear to be mutated in the  
562 experimental evolution.



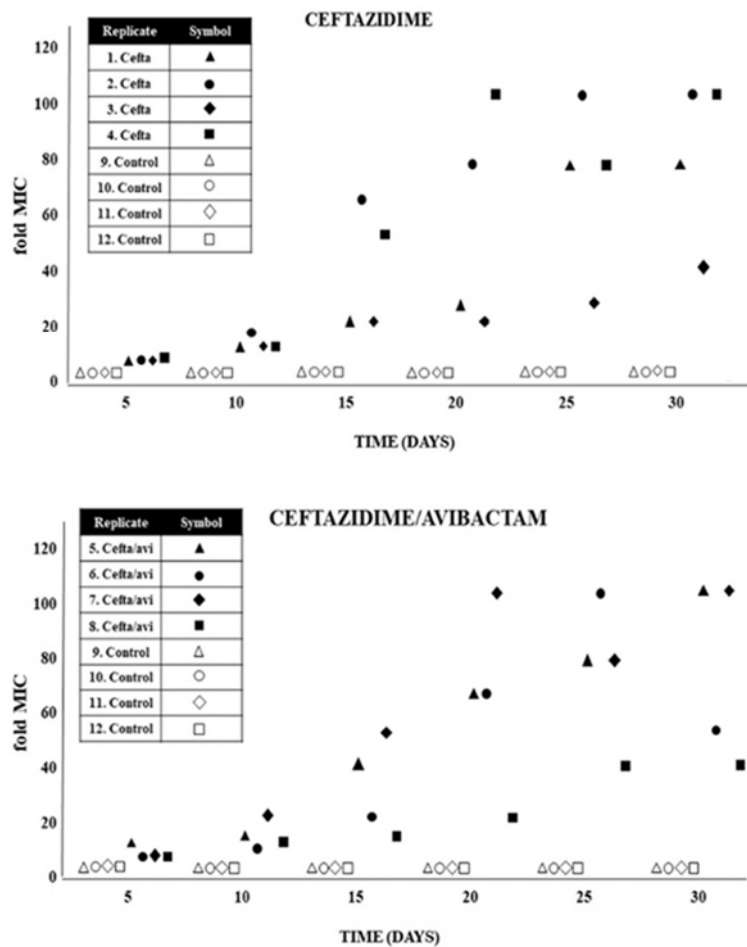

575

576 **Figure 2 | Evolution of *P. aeruginosa* PA14 under ceftazidime and**  
577 **ceftazidime/avibactam selective pressure.** Graphs show the rise of the MICs over the  
578 evolution period ( $MIC_{population\ X}/MIC_{PA14}$ ), being  $MIC_{PA14} = 4\ \mu g/ml$  and  $X = 1-12$ , from  
579 the beginning of the experiment to high levels of resistance (doubling the antibiotic  
580 concentration every 5 days). The values were obtained by liquid MIC determination in a  
581 p96 well plate (Table S3), because the detection limit of the ceftazidime E-test is 256  
582  $\mu g/ml$ , limiting the assessment of resistance levels from day 20 to the end of the  
583 experiment.

584

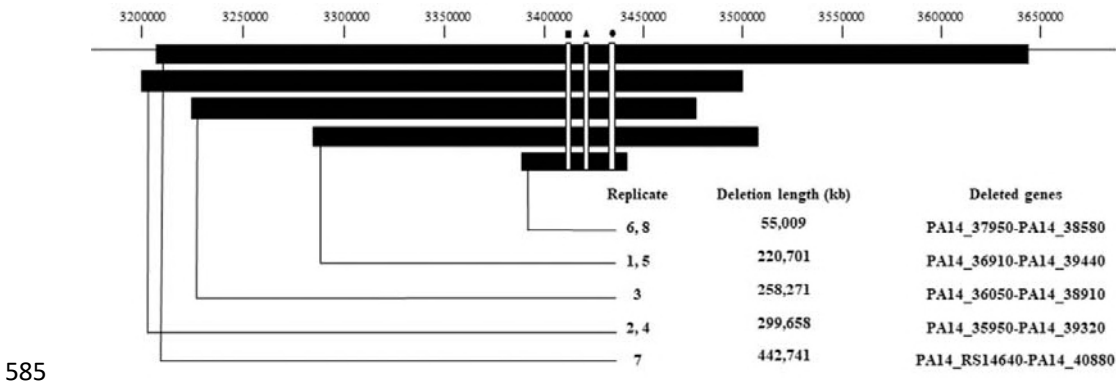

585

586 **Figure 3 | Large deletions present in all ceftazidime and ceftazidime/avibactam**  
587 **evolved populations since the first day of the experimental evolution.** The figure  
588 indicates the length of the deletions and the deleted genes in each replicate, as well as  
589 their genome localization, which corresponds with *P. aeruginosa* UCBPP-PA14  
590 reference chromosome (NC\_008463.1). Black square: *mexXY*, black triangle: *galU*,  
591 black circle: *hmgA*.

592

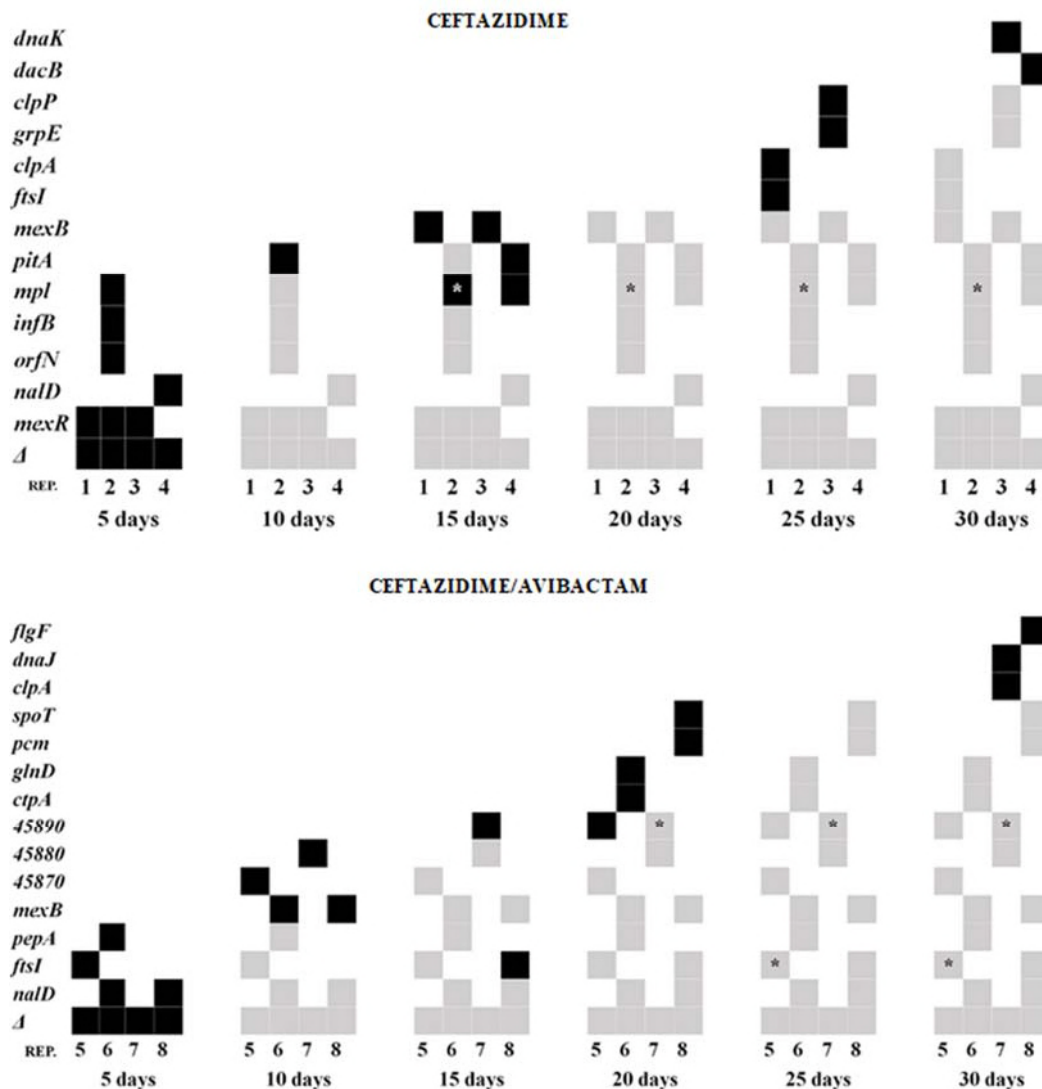

593

594 **Figure 4 | Order of appearance of genetic changes.** Ceftazidime and  
595 ceftazidime/avibactam resistance mutations appearance during the evolution process, as  
596 determined by PCR amplifications of known SNVs/MNVs in evolved populations. The  
597 *mexR* mutation in ceftazidime population 2 actually indicates that this mutation  
598 occurred in the intergenic region between *mexR* and *mexA*. The “\*” refers to a second  
599 mutation in a gene that mutated before. We cannot ditch that other mutations may have  
600 appeared over the 30 days evolution process. “Δ”: large deletion. Rep: replicate. Black  
601 square: the mutation appeared in this evolutionary step. Grey square: the mutation  
602 appeared in a previous evolutionary step.

603 **Supplementary Table S1 | Genetic modifications detected in ceftazidime and**  
604 **ceftazidime/avibactam evolved *P. aeruginosa* PA14 populations.**

605

| Gene                                   | Replicate | Mutation      | Localization | Aa Change         |
|----------------------------------------|-----------|---------------|--------------|-------------------|
| <b>BOTH TREATMENTS</b>                 |           |               |              |                   |
| <i>nalD</i>                            | 4, 6, 8   | G-->T         | 32           | Thr11Asn          |
|                                        | 1         | C-->G         | 1126         | Leu376Val         |
| <i>mexB</i>                            | 3         | T-->G         | 2300         | Val767Gly         |
|                                        | 6         | C-->T         | 1345         | Leu449Phe         |
|                                        | 8         | C-->T         | 1693         | Pro565Ser         |
|                                        | 1         | G-->A         | 1510         | Arg504Cys         |
| <i>ftsI</i>                            |           | C-->T         | 1567         | Val523Met         |
|                                        | 5         | C-->T         | 1511         | Arg504His         |
|                                        | 8         | C-->T         | 851          | Arg284Gln         |
| <i>clpA</i>                            | 1         | Del-A         | 515          | His172fs          |
|                                        | 5         | A-->G         | 1634         | Tyr545Cys         |
| <b>CEFTAZIDIME TREATMENT</b>           |           |               |              |                   |
|                                        | 1         | Ins-A         | 80-81        | Glu27fs           |
| <i>mexR</i>                            | 3         | Del-AAT       | 126-128      | Leu43del          |
|                                        | 2         | Del-CGGCGGCTT | 1305-1313    | Phe438_Gly440 del |
| <i>mpl</i>                             |           | T-->G         | 371          | Val124Gly         |
|                                        | 4         | T-->G         | 416          | Val139Gly         |
| <i>orfN</i>                            | 2         | Ins-G         | 138-139      | Val50fs           |
| <i>infB</i>                            | 2         | C-->T         | 2407         | Val803Ile         |
|                                        | 2         | A-->C         | 133          | Thr45Pro          |
| <i>pitA</i>                            | 4         | A-->C         | 367          | Thr123Pro         |
| <i>grpE</i>                            | 3         | Del-G         | 39           | Glu14fs           |
| <i>clpP</i>                            | 3         | Del-C         | 365          | Gly122fs          |
| <i>dnaK</i>                            | 3         | G-->A         | 1115         | Ala372Val         |
| <i>dacB</i>                            | 4         | C-->T         | 343          | Gly115Ser         |
| <b>CEFTAZIDIME/AVIBACTAM TREATMENT</b> |           |               |              |                   |
| <i>dnaJ</i>                            | 5         | G-->A         | 1081         | Pro361Ser         |

|                   |   |           |           |           |
|-------------------|---|-----------|-----------|-----------|
| <i>pepA</i>       | 6 | C-->T     | 1439      | Gly480Asp |
| <i>ctpA</i>       | 6 | G-->A     | 971       | Ser324Asn |
| <i>glnD</i>       | 6 | Ins-G     | 2466-2467 | Asp823fs  |
| <i>flgF</i>       | 6 | C-->A     | 676       | Glu226*   |
| <i>pcm</i>        | 8 | Ins-G     | 530-531   | Arg180fs  |
| <i>spoT</i>       | 8 | T-->C     | 931       | Phe311Leu |
| <i>PA14_45870</i> | 5 | Del-21 pb | 712-732   | Glu238fs  |
| <i>PA14_45880</i> | 7 | C-->A     | 159       | Met53Ile  |
|                   |   | G-->A     | 1001      | Ser334Leu |
| <i>PA14_45890</i> | 7 | G-->A     | 836       | Pro279Leu |
|                   | 5 | G-->A     | 830       | Ala277Val |

#### INTERGENIC MUTATIONS

|                                                                |    |       |         |   |
|----------------------------------------------------------------|----|-------|---------|---|
| <b>Between<br/><i>PA14_45410</i> and<br/><i>PA14_45430</i></b> | 10 | C-->T | 4044801 | - |
| <b>Between 16S<br/>ribosomal RNA<br/>and <i>PA14_70920</i></b> | 12 | T-->C | 6317713 | - |
| <b>Between <i>grpE</i> and<br/><i>recN</i></b>                 | 1  | T-->C | 5621761 | - |
| <b>Between <i>mexR</i> and<br/><i>mexA</i></b>                 | 2  | C-->T | 486683  | - |

606

607 Nucleotide location of the mutations and associated amino acid changes. Genetic  
608 modifications in intergenic regions are also included, and their locations referred to the  
609 nucleotide position in *P. aeruginosa* UCBPP-PA14 reference chromosome  
610 (NC\_008463.1). Fs: frameshift. \*: stop codon. Del: deletion. Ins: insertion.

611 **Supplementary Table S2 | Primers used to verify nucleotide modifications detected in whole-genome sequencing.**

612

| Gene        | Genetic change | Localization | Primer fw (5'-3')               | Primer rv (5'-3')    |
|-------------|----------------|--------------|---------------------------------|----------------------|
| <i>nalD</i> | C-->A          | 32           | SNVs/MNVs<br>AATACTTCGAGTCCGCCC | TTGAGCATCTCGTTGAACAG |
|             | C-->G          | 1126         |                                 |                      |
| <i>mexB</i> | C-->T          | 1345         | ATCCTCCTCGTGTTCCCTG             | CAGGTATTCGCGCATC     |
|             | C-->T          | 1693         |                                 |                      |
|             | T-->G          | 2300         | ACGAACCGCAGTACAAGCTG            | CGCTCCAGCTTCGGCGAACC |
| <i>ftsI</i> | C-->T          | 1510         |                                 |                      |
|             | G-->A          | 1567         | AACAAGTGGTCGAGGCCAG             | TGCTGTTCCGGTGGCCGT   |
|             | G-->A          | 1511         |                                 |                      |
|             | G-->A          | 851          | CTGCGCAACGCTCTGCT               | AATTGCGCGATACGTCGCGA |
|             | Del-A          | 515          | TCAAGCAGCAGAGCATCGC             | CTACCAGCAGCGGGTTGTT  |
| <i>clpA</i> | A-->G          | 1634         | TCGTTCTCTTCGCCGGT               | CGTTGTTGTCCGTCAGGGT  |
|             | Ins-A          | 80-81        |                                 |                      |
| <i>mexR</i> | Del-AAT        | 126-128      | ATGAACTACCCCGTGAAT              | AAGCTGCGCTGGTCGCT    |
|             | T-->G          | 371          | GAGCATGTCCTGAACAAGGG            | CGGTAATGGACGAACTTCGA |
|             | T-->G          | 416          |                                 |                      |
| <i>mpl</i>  | Del-CGGCGGCTT  | 1305-1313    | AACCTGGGCTGGGACCT               | TCACTCGGCCAGCGCCGC   |

|                   |           |           |                       |                       |
|-------------------|-----------|-----------|-----------------------|-----------------------|
| <i>orfN</i>       | Ins-G     | 138-139   | ATGGACGTTCCCAATGCCCCG | CCGCCAGAATCAGCAAAACC  |
| <i>infB</i>       | C-->T     | 2407      | ATCTGCGGGAGAACATCCT   | CCTTCTCGAACACTTCGATC  |
| <i>pitA</i>       | A-->C     | 133       | ATGTTTCGATCTTTTCAGCGG | CGCGATGTCGATCGCCTT    |
|                   | A-->C     | 367       |                       |                       |
| <i>grpE</i>       | Del-G     | 39        | GAACCGTGGAAAGCCGTCCC  | AACCTGTGCGCCTTCTCGAC  |
| <i>clpP</i>       | Del-C     | 365       | TTGCTGTTCTGAGGCTGA    | TTCAGACGCTCCTTGATGAA  |
| <i>dnaK</i>       | G-->A     | 1115      | TGAAGGATGCCGGCCTGGAT  | TCTTGTGGACGCTGAAGA    |
| <i>dacB</i>       | C-->T     | 343       | ACCTATGCCGCCCTGGAAA   | CGTCGTTGAATACCGGCAA   |
| <i>dnaJ</i>       | G-->A     | 1081      | AAGCTGTTCCGCCTGCGCG   | ATAAAACCACTCCACGCG    |
| <i>PA14_45870</i> | Del-21 pb | 712-732   | TCGAGAACAAGCTGCTGCAT  | CGGTACTGGTCAGCATCT    |
| <i>pepA</i>       | C-->T     | 1439      | CTGTTTCGACGAATACCAGGA | TCACTTGGCCC GTTCCAG   |
| <i>ctpA</i>       | G-->A     | 971       | AGGAAGTGGTCAAGGCGCT   | TGGATGGAGCGCCCCGTT    |
| <i>glnD</i>       | Ins-G     | 2466-2467 | ACTCCATCGGCAACAACCC   | ACAGCTGCTCGACCAGGGC   |
| <i>flgF</i>       | C-->A     | 676       | TGAAGCAGATGGAGAAGGG   | TTAGCTGATTTGCAAAACCC  |
| <i>PA14_45880</i> | C-->A     | 159       | TCGAGGACGAGGCGAAGA    | CGAGGAAGGAGAACGGCTTGA |
| <i>pcm</i>        | Ins-G     | 530-531   | TTCGTTGGGGCGATGGCTG   | TACCGAGTCGAGTACCTGG   |

|                   |       |      |                      |                      |
|-------------------|-------|------|----------------------|----------------------|
| <i>spoT</i>       | T-->C | 931  | TCAACGAGATCATGGACGTC | CTCGTCGTTGGACTTGTACA |
|                   | G-->A | 1001 |                      |                      |
| <i>PA14_45890</i> | G-->A | 836  | GCCAACGACCAGTTGTTCAA | ACCGTAGCGACGATCAGGGT |
|                   | G-->A | 830  |                      |                      |

#### LARGE DELETIONS

|              |               |                 |                                                |                                              |
|--------------|---------------|-----------------|------------------------------------------------|----------------------------------------------|
| <b>Del 1</b> | Del 55009 bp  | 3387426-3442435 | ATGCAACACAGCCAAGTGT<br>CTGTTCGAGATCGTCGAAGG    | TCAGAACGGTTTGGTCGGCA<br>TTCGAACTCTTTCTCCTGTA |
| <b>Del 2</b> | Del 220701 bp | 3288650-3509351 | ATGCAACACAGCCAAGTGT<br>CTGTTCGAGATCGTCGAAGG    | TCAGAACGGTTTGGTCGGCA<br>TTCGAACTCTTTCTCCTGTA |
| <b>Del 3</b> | Del 258271 bp | 3210297-3468568 | GCTTCACCGGTTTCGCTGAAG<br>CTGTTCGAGATCGTCGAAGG  | TCAGTCAATCGCCGCCCCG<br>TTCGAACTCTTTCTCCTGTA  |
| <b>Del 4</b> | Del 299648 bp | 3200274-3499932 | GCTTCACCGGTTTCGCTGAAG<br>CTGTTCGAGATCGTCGAAGG  | TCAGTCAATCGCCGCCCCG<br>TTCGAACTCTTTCTCCTGTA  |
| <b>Del 5</b> | Del 442741 bp | 3203830-3646571 | GCTTCACCGGTTTCGCTGAAG<br>GTGGGCAGCATCTACCTGATT | TCAGTCAATCGCCGCCCCG<br>TGATGAGTTCCGGCGCCTT   |

613

614 The locations of SNVs/MNVs are referred to the specific gene, whereas the large deletions locations remit to the nucleotide position in *P.*  
615 *aeruginosa* UCBPP-PA14 reference chromosome (NC\_008463.1)

**Supplementary Table S3 | MIC values (µg/ml) obtained by double dilution for the population replicates during selective pressure with either ceftazidime or ceftazidime/avibactam.**

| Treatment                              | Replicate | 5 d | 10 d | 15 d | 20 d | 25 d | 30 d |
|----------------------------------------|-----------|-----|------|------|------|------|------|
| <b>CEFTAZIDIME</b>                     | <b>1</b>  | 20  | 40   | 75   | 100  | 300  | 300  |
|                                        | <b>2</b>  | 20  | 60   | 250  | 300  | 400  | 400  |
|                                        | <b>3</b>  | 20  | 40   | 75   | 100  | 150  | 150  |
|                                        | <b>4</b>  | 25  | 40   | 100  | 400  | 300  | 400  |
| <b>CEFTAZIDIME<br/>+<br/>AVIBACTAM</b> | <b>5</b>  | 40  | 50   | 150  | 250  | 300  | 400  |
|                                        | <b>6</b>  | 15  | 30   | 75   | 250  | 400  | 200  |
|                                        | <b>7</b>  | 20  | 80   | 200  | 400  | 300  | 400  |
|                                        | <b>8</b>  | 15  | 40   | 50   | 75   | 150  | 150  |
| <b>CONTROLS</b>                        | <b>9</b>  | 4   | 4    | 4    | 4    | 4    | 4    |
|                                        | <b>10</b> | 4   | 4    | 4    | 4    | 4    | 4    |
|                                        | <b>11</b> | 4   | 4    | 4    | 4    | 4    | 4    |
|                                        | <b>12</b> | 4   | 4    | 4    | 4    | 4    | 4    |

620

621 The table shows the liquid MIC values against ceftazidime for each replicate population  
622 every five days (the antibiotic concentration was doubled every 5 days). The grey boxes  
623 indicate the steps in which these particular replicates were unable to grow. In these  
624 situations, the previous ceftazidime concentrations (8MIC in populations 6, 8; and  
625 16MIC in populations 3, 7) were maintained for the rest of the experiment.

**Supplementary Table S4 | Disk diffusion tests with antibiotics of distinct structural families in the ceftazidime and ceftazidime/avibactam final evolved populations.**

| Sample                         | Tgc | Tet | Atm | Ipm | Mer | Caz | Cip | Lev | Nor | Tob | S     | Ak | Cm | Cs | PB | C  | E  | F  |
|--------------------------------|-----|-----|-----|-----|-----|-----|-----|-----|-----|-----|-------|----|----|----|----|----|----|----|
| PA14 wt                        | 14  | 16  | 26  | 30  | 21  | 27  | 36  | 31  | 32  | 26  | 22    | 25 | 31 | 17 | 14 | 18 | 13 | 14 |
| <b>CONTROLS</b>                |     |     |     |     |     |     |     |     |     |     |       |    |    |    |    |    |    |    |
| 9                              | 12  | 14  | 28  | 30  | 19  | 28  | 37  | 28  | 32  | 22  | 14/21 | 23 | 28 | 17 | 14 | 19 | 13 | 13 |
| 10                             | 13  | 15  | 27  | 31  | 17  | 28  | 37  | 29  | 32  | 23  | 20    | 24 | 30 | 17 | 14 | 19 | 12 | 14 |
| 11                             | 13  | 15  | 28  | 32  | 18  | 28  | 38  | 30  | 34  | 24  | 21    | 25 | 29 | 17 | 14 | 18 | 12 | 15 |
| 12                             | 14  | 15  | 28  | 32  | 23  | 28  | 36  | 27  | 32  | 24  | 20    | 25 | 30 | 17 | 14 | 17 | 12 | 16 |
| <b>CEFTAZIDIME</b>             |     |     |     |     |     |     |     |     |     |     |       |    |    |    |    |    |    |    |
| 1                              | 13  | 12  | 0   | 19  | 0   | 0   | 30  | 21  | 26  | 26  | 26    | 29 | 32 | 19 | 15 | 0  | 0  | 27 |
| 2                              | 15  | 12  | 0   | 19  | 0   | 0   | 33  | 26  | 28  | 29  | 29    | 31 | 35 | 19 | 16 | 0  | 0  | 33 |
| 3                              | 15  | 10  | 0   | 25  | 0   | 0   | 31  | 24  | 28  | 25  | 24    | 28 | 32 | 19 | 16 | 0  | 0  | 27 |
| 4                              | 15  | 12  | 0   | 22  | 0   | 0   | 33  | 24  | 28  | 27  | 28    | 31 | 36 | 19 | 16 | 0  | 0  | 31 |
| <b>CEFTAZIDIME + AVIBACTAM</b> |     |     |     |     |     |     |     |     |     |     |       |    |    |    |    |    |    |    |
| 5                              | 19  | 19  | 0   | 10  | 0   | 0   | 33  | 30  | 31  | 24  | 23    | 28 | 31 | 17 | 15 | 0  | 6  | 27 |
| 6                              | 20  | 22  | 7   | 24  | 0   | 0   | 34  | 30  | 33  | 25  | 22    | 29 | 34 | 18 | 16 | 0  | 0  | 26 |
| 7                              | 23  | 22  | 0   | 9   | 0   | 0   | 38  | 32  | 34  | 23  | 22    | 26 | 33 | 19 | 16 | 0  | 0  | 25 |
| 8                              | 21  | 19  | 0   | 24  | 0   | 0   | 33  | 29  | 28  | 26  | 24    | 30 | 34 | 19 | 16 | 0  | 0  | 27 |

The table presents the diameters of halo (mm) in the disk diffusion assays for each replicate population at the end of the experimental evolution. The antibiotics in which halos differed were selected for an E-test assay (Table 1). Indeed, in some cases we chose for the E-test only one or two representative cases of a particular structural family, in order to avoid redundancy. Double inhibition halos are shown as two values separated by a slash (X/X). Tgc: tigecycline, tet: tetracycline, atm: aztreonam, ipm: imipenem, mer: meropenem, caz: ceftazidime, cip: ciprofloxacin, lev: levofloxacin, nor: norfloxacin, tob: tobramycin, s: streptomycin, ak: amikacin, cm: gentamycin, cs: colistin, pb: polymyxin B, c: chloramphenicol, e: erythromycin, f: fosfomycin.
